# Supplementary material for: Analysis of Trigger Factors in Episodic Migraineurs Using a Smartphone Headache Diary Applications
Source: PubMed Central journal article supplement (PMC4764678; doi:10.1371/journal.pone.0149577), 2016-02-22
Supplement: pone.0149577.s002.pdf [file pone.0149577.s002.pdf]

**S1 Table. Chi-square analysis about likelihood of Headache and Number of Triggers.**

| <b>Number of Triggers</b>                | <b>P-value</b> |
|------------------------------------------|----------------|
| trigger 1 vs 2-9 triggers                | 0.95           |
| trigger 1 vs 2 triggers vs 3 vs 4 vs 5-9 | 0.24           |
| trigger 1 vs 2 triggers vs 3-9 triggers  | 0.99           |
